# Supplementary material for: FeNi decorated nitrogen-doped hollow carbon spheres as ultra-stable bifunctional oxygen electrocatalyst for rechargeable zinc–air battery with 2.7% decay after 300 hours cycling
Source: Royal Society of Chemistry journal article supplement (doi:10.1039/d3ra08572d), 2024-01-01
Supplement: d3ra08572d1.pdf [file d3ra08572d1.pdf]

### Detail of Structural Characterization

Raman spectroscopy was performed on the pure NHCS and FeNi@NHCS samples. The morphology of the sample was observed by Field emission scanning electron microscopy (SEM, JSM-7100F) and the structure was analyzed by X-ray diffraction (XRD, Bruker D8). The fine structure and elemental distribution of the FeNi@NHCS were characterized by scanning transmission electron microscopy (STEM, JEOL ARM 200F). The composition of the FeNi alloy on NHCS was tested by inductively coupled plasma optical emission spectrometer (ICP-AES, Optimal8000). Nitrogen adsorption/desorption tests were conducted on the pure NHCS and FeNi@NHCS samples. The specific surface area and pore size distribution of the samples were calculated by using Brunauer-Emmett-Teller (BET) method and Barrett-Joyner-Halenda (BJH) model. X-ray photoelectron spectroscopy (XPS) measurement was performed to analyze the valence state and electron structure of the FeNi@NHCS sample.

### Calculation of electron transfer number (n)

The Koutecky-Levich equation was used to calculate the electron transfer number (n) per oxygen molecule during ORR process:

$$\frac{1}{j} = \frac{1}{j_L} + \frac{1}{j_K} = \frac{1}{B\omega^{1/2}} + \frac{1}{j_k}$$
$$B = 0.62nFC_{O_2}D_{O_2}^{2/3}v^{-1/6}$$

In the Koutecky-Levich equation,  $j$  is the measured current density,  $j_K$  and  $j_L$  are the kinetic diffusion current density and the kinetic limiting current density, respectively.  $\omega$  is the angular velocity,  $n$  is the transferred electron number,  $F$  is the Faraday constant ( $96,485 \text{ C mol}^{-1}$ ),  $C_{O_2}$  is the saturated concentration of  $O_2$  in 0.1 M KOH ( $1.2 \times 10^{-6} \text{ mol cm}^{-3}$ ),  $D_{O_2}$  is the diffusion coefficient of  $O_2$  in 0.1 M KOH ( $1.9 \times 10^{-5} \text{ cm}^2 \text{ s}^{-1}$ ), and  $v$  is the kinetic viscosity of 0.1 M KOH ( $0.01 \text{ cm}^2 \text{ s}^{-1}$ ).

Table S1. The electrochemical properties of the optimized FeNi<sub>x</sub>@NHCS sample compared with recently reported FeNi electrocatalysts.

| Catalysts               | E <sub>1/2</sub> (V vs. RHE) | E <sub>10 mA cm<sup>-2</sup>-1.23V</sub><br>(mV) | Reference                                                                    |
|-------------------------|------------------------------|--------------------------------------------------|------------------------------------------------------------------------------|
| FeNi <sub>3</sub> @NHCS | 0.828                        | 281                                              | This work                                                                    |
| Fe/Ni-NC  FeNi@G        | 0.885                        | 273                                              | Electrochimica Acta <b>2023</b> , 458, 142594                                |
| FeNi/N-GPCM             | 0.883                        | 310                                              | <i>Separation and Purification Technology</i> <b>2022</b> ,308, 122974       |
| FeNi@NC                 | 0.878                        | 360                                              | <i>International Journal of Hydrogen Energy</i> <b>2022</b> ,47, 16025-16035 |
| FeNi@NCSs               | 0.84                         | 318                                              | <i>Journal of Colloid and Interface Science</i> <b>2022</b> , 628, 499-507   |
| FeNi-NPC HT             | 0.859                        | 321                                              | <i>Journal of Energy Chemistry</i> 2023,83, 264-274                          |
| B-FeNi-NC-1000          | 0.9                          | 283                                              | <i>Chemical Engineering Science</i> <b>2022</b> ,247, 117038                 |
| FeNi Sas/NC             | 0.84                         | 270                                              | <i>Advanced Energy Materials</i> <b>2021</b> ,11, 2101242                    |
| FeNi-NCS-2              | 0.867                        | 395                                              | <i>International Journal of Hydrogen Energy</i> <b>2021</b> ,47, 984-992     |
| Glu-NiFe                | 0.85                         | 440                                              | <i>Electrochimica Acta</i> <b>2022</b> ,428, 140938                          |
| FeNi/N-CNT              | 0.82                         | 357                                              | <i>Journal of Materials Chemistry A</i> <b>2022</b> ,10, 9911-9921           |

Figure S1

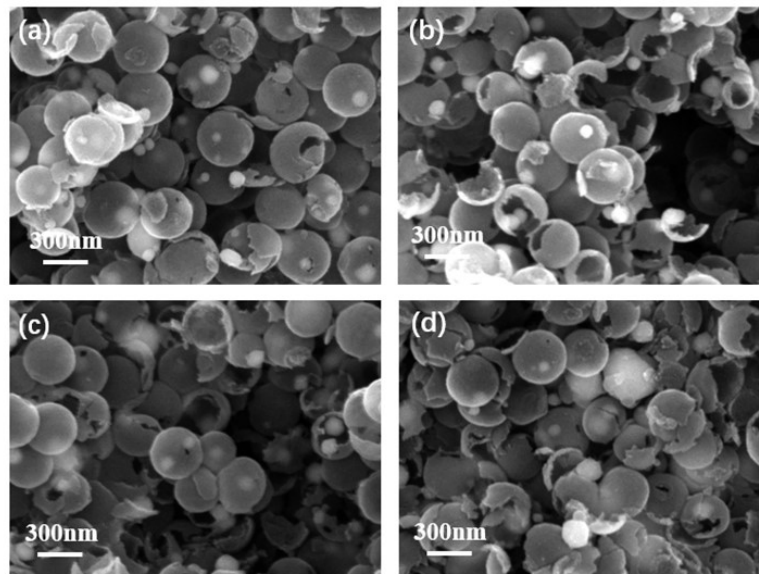

Figure S1. SEM images of FeNi@NHCS samples prepared at (a) 500 °C, (b) 600 °C, (c) 700 °C and (d) 800 °C.

Figure S2

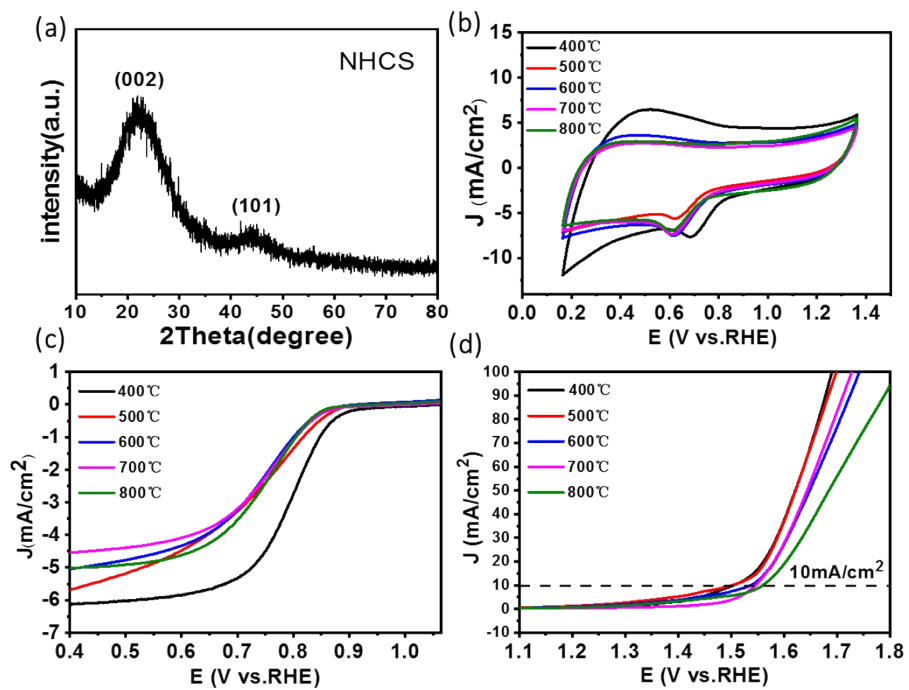

Figure S2. (a) XRD patterns of Pure NHCS sample, (b) C-V curves and (c) LSV curves of sample (T0~T4) in O<sub>2</sub>-saturated 0.1 M KOH electrolyte at scan rate of 5 mV s<sup>-1</sup> at 1600 rpm, (d) LSV curves in O<sub>2</sub>-saturated 1 M KOH at scan rate of 5 mV s<sup>-1</sup> at 1600 rpm of sample (T0~T4).
